# Supplementary material for: Stability of Sources of Resistance to Cowpea Aphid (Aphis craccivoraKoch, Hemiptera: Aphididae) across Major Cowpea Production Zones in Ghana
Source: Hindawi journal article supplement (doi:10.1155/2020/8869334), 2020-07-15
Supplement: f1 [file 8869334.f1.docx]

Supplementary material 1. Mean of seedlings killed (%) and vigour score for the cultivars/genotypes during screening at the different locations in six regions in Ghana. Data are means ± standard error of means

| Region | Location | Cultivar/genotypes | Seedling killed (%) | Vigour score |
| --- | --- | --- | --- | --- |
| Upper East | Bawku | SARC1-57-2 | 3.89±1.11 | 3.78±0.15 |
| Upper East | Bawku | SARC1-91-1 | 6.67±0.83 | 3.44±0.18 |
| Upper East | Bawku | Apagbaala | 94.44±1.55 | 1.22±0.15 |
| Upper East | Bawku | Songotra | 97.78±0.88 | 1.11±0.11 |
| Upper East | Bawku | Zaayura | 88.89±0.74 | 1.33±0.17 |
| Upper East | Sakote | SARC1-57-2 | 4.44±1.55 | 3.67±0.17 |
| Upper East | Sakote | SARC1-91-1 | 10.00±0.00 | 3.56±0.18 |
| Upper East | Sakote | Apagbaala | 96.11±1.39 | 1.22±0.15 |
| Upper East | Sakote | Songotra | 95.56±1.55 | 1.22±0.15 |
| Upper East | Sakote | Zaayura | 85.56±1.76 | 1.56±0.18 |
| Upper East | Navrongo | SARC1-57-2 | 3.89±0.73 | 3.78±0.15 |
| Upper East | Navrongo | SARC1-91-1 | 6.11±0.73 | 3.56±0.18 |
| Upper East | Navrongo | Apagbaala | 94.44±1.30 | 1.22±0.15 |
| Upper East | Navrongo | Songotra | 96.11±1.39 | 1.22±1.15 |
| Upper East | Navrongo | Zaayura | 86.11±1.62 | 1.89±0.11 |
| Upper West | Tumu | SARC1-57-2 | 5.00±0.00 | 3.78±0.15 |
| Upper West | Tumu | SARC1-91-1 | 6.67±0.83 | 3.44±0.18 |
| Upper West | Tumu | Apagbaala | 97.22±1.21 | 1.11±0.11 |
| Upper West | Tumu | Songotra | 96.67±1.18 | 1.11±0.11 |
| Upper West | Tumu | Zaayura | 85.56±1.76 | 1.89±0.11 |
| Upper West | Nandom | SARC1-57-2 | 2.78±0.88 | 3.67±0.17 |
| Upper West | Nandom | SARC1-91-1 | 8.33±1.67 | 3.56±0.18 |
| Upper West | Nandom | Apagbaala | 95.56±1.30 | 1.22±1.15 |
| Upper West | Nandom | Songotra | 96.67±1.18 | 1.11±0.11 |
| Upper West | Nandom | Zaayura | 85.00±2.04 | 1.67±0.17 |
| Upper West | Wa | SARC1-57-2 | 5.56±0.56 | 3.67±0.17 |
| Upper West | Wa | SARC1-91-1 | 11.11±1.11 | 3.44±0.18 |
| Upper West | Wa | Apagbaala | 95.56±1.55 | 1.33±0.17 |
| Upper West | Wa | Songotra | 96.11±1.39 | 1.22±0.15 |
| Upper West | Wa | Zaayura | 82.78±1.21 | 1.89±0.11 |
| Northern | Nyankpala | SARC1-57-2 | 2.22±0.88 | 3.78±0.15 |
| Northern | Nyankpala | SARC1-91-1 | 6.67±0.83 | 3.67±0.17 |
| Northern | Nyankpala | Apagbaala | 97.78±1.21 | 1.11±0.11 |
| Northern | Nyankpala | Songotra | 96.67±1.67 | 1.33±0.17 |
| Northern | Nyankpala | Zaayura | 83.33±1.18 | 1.89±0.11 |
| Northern | Yendi | SARC1-57-2 | 3.89±0.73 | 3.77±0.15 |
| Northern | Yendi | SARC1-91-1 | 7.22±0.88 | 3.33±0.17 |
| Northern | Yendi | Apagbaala | 95.56±1.55 | 1.22±0.15 |
| Northern | Yendi | Songotra | 97.22±1.47 | 1.22±0.15 |
| Northern | Yendi | Zaayura | 87.22±1.21 | 1.89±0.11 |
| Northern | Walewale | SARC1-57-2 | 2.78±0.88 | 3.67±0.17 |
| Northern | Walewale | SARC1-91-1 | 10.00±1.44 | 3.33±0.17 |
| Northern | Walewale | Apagbaala | 96.11±1.39 | 1.22±0.15 |
| Northern | Walewale | Songotra | 95.56±1.55 | 1.33±0.17 |
| Northern | Walewale | Zaayura | 86.67±1.18 | 1.89±0.11 |
| Brong Ahafo | Wenchi | SARC1-57-2 | 4.44±1.00 | 3.89±0.11 |
| Brong Ahafo | Wenchi | SARC1-91-1 | 7.78±0.88 | 3.33±0.17 |
| Brong Ahafo | Wenchi | Apagbaala | 95.00±1.67 | 1.44±0.18 |
| Brong Ahafo | Wenchi | Songotra | 97.22±0.88 | 1.00±0.00 |
| Brong Ahafo | Wenchi | Zaayura | 87.78±1.21 | 2.00±0.00 |
| Brong Ahafo | Nkoranza | SARC1-57-2 | 5.00±1.44 | 4.00±0.00 |
| Brong Ahafo | Nkoranza | SARC1-91-1 | 9.44±0.56 | 3.22±0.15 |
| Brong Ahafo | Nkoranza | Apagbaala | 97.22±1.21 | 1.11±0.11 |
| Brong Ahafo | Nkoranza | Songotra | 96.67±1.44 | 1.22±0.15 |
| Brong Ahafo | Nkoranza | Zaayura | 86.11±1.62 | 2.00±0.00 |
| Brong Ahafo | Kintampo | SARC1-57-2 | 3.33±0.83 | 4.00±0.00 |
| Brong Ahafo | Kintampo | SARC1-91-1 | 6.67±0.83 | 3.440.18 |
| Brong Ahafo | Kintampo | Apagbaala | 95.00±1.44 | 1.22±0.15 |
| Brong Ahafo | Kintampo | Songotra | 96.67±1.18 | 1.00±0.00 |
| Brong Ahafo | Kintampo | Zaayura | 85.00±1.67 | 2.00±0.00 |
| Central | Asowanzi | SARC1-57-2 | 3.89±0.73 | 3.78±0.15 |
| Central | Asowanzi | SARC1-91-1 | 7.22±0.88 | 3.56±0.18 |
| Central | Asowanzi | Apagbaala | 97.78±1.21 | 1.11±0.11 |
| Central | Asowanzi | Songotra | 96.67±1.18 | 1.11±0.11 |
| Central | Asowanzi | Zaayura | 85.00±1.67 | 2.00±0.00 |
| Central | UCC | SARC1-57-2 | 2.22±0.88 | 3.89±0.11 |
| Central | UCC | SARC1-91-1 | 7.78±1.69 | 3.44±0.18 |
| Central | UCC | Apagbaala | 96.11±1.11 | 1.11±0.11 |
| Central | UCC | Songotra | 96.11±1.39 | 1.00±0.00 |
| Central | UCC | Zaayura | 85.56±1.94 | 1.78±0.15 |
| Central | Mankesim | SARC1-57-2 | 5.00±0.83 | 3.67±0.17 |
| Central | Mankesim | SARC1-91-1 | 10.00±0.83 | 3.11±0.11 |
| Central | Mankesim | Apagbaala | 96.67±1.18 | 1.00±0.00 |
| Central | Mankesim | Songotra | 97.22±1.21 | 1.11±0.11 |
| Central | Mankesim | Zaayura | 83.33±1.18 | 2.00±0.00 |
| Volta | Sogakope | SARC1-57-2 | 2.78±0.88 | 3.89±0.11 |
| Volta | Sogakope | SARC1-91-1 | 6.11±1.11 | 3.67±0.17 |
| Volta | Sogakope | Apagbaala | 98.33±0.83 | 1.00±0.00 |
| Volta | Sogakope | Songotra | 96.11±1.62 | 1.33±0.17 |
| Volta | Sogakope | Zaayura | 83.33±0.83 | 2.00±0.00 |
| Volta | Nkwanta | SARC1-57-2 | 3.33±0.83 | 3.78±0.15 |
| Volta | Nkwanta | SARC1-91-1 | 6.67±0.83 | 3.44±0.18 |
| Volta | Nkwanta | Apagbaala | 96.67±1.44 | 1.00±0.00 |
| Volta | Nkwanta | Songotra | 96.67±1.44 | 1.22±0.15 |
| Volta | Nkwanta | Zaayura | 86.67±1.18 | 2.00±0.00 |
| Volta | Kpeve | SARC1-57-2 | 2.22±0.88 | 4.00±0.00 |
| Volta | Kpeve | SARC1-91-1 | 9.44±1.76 | 3.44±0.18 |
| Volta | Kpeve | Apagbaala | 95.56±1.30 | 1.11±0.11 |
| Volta | Kpeve | Songotra | 96.11±1.39 | 1.11±0.11 |
| Volta | Kpeve | Zaayura | 86.11±1.11 | 2.00±0.00 |
